# Supplementary material for: Identification of the Protein Glycation Sites in Human Myoglobin as Rapidly Induced by d-Ribose
Source: MDPI journal article supplement (doi:10.3390/molecules26195829), 2021-09-26
Supplement: s1 [file s1]

## Supporting Information

### Identification of the Protein Glycation Sites in Human Myoglobin as Rapidly Induced by *D*-Ribose

Jing-Jing Liu,<sup>a</sup> Yong You,<sup>b</sup> Shu-Qin Gao,<sup>b</sup> Shuai Tang,<sup>a</sup> Lei Chen,<sup>a</sup> Ge-Bo Wen,<sup>b</sup> and  
Ying-Wu Lin<sup>\*a, b</sup>

<sup>a</sup> School of Chemistry and Chemical Engineering, University of South China, Hengyang 421001, China;

<sup>b</sup> Laboratory of Protein Structure and Function, University of South China, Hengyang 421001, China.

\* Correspondence: ywlin@usc.edu.cn

#### Contents

|                                                                                                                                                                             |       |
|-----------------------------------------------------------------------------------------------------------------------------------------------------------------------------|-------|
| <b>1. Figure S1.</b> The UV-Vis spectra of HMb incubated with D-ribose and D-glucose.                                                                                       | P. S2 |
| <b>2. Figure S2.</b> The ESI-MS spectrum of the expressed and purified HMb.                                                                                                 | P. S2 |
| <b>3. Figure S3.</b> The original multiply-charged series in the ESI-MS spectra of HMb after reacting with <i>D</i> -ribose at different hours.                             | P. S3 |
| <b>4. Figure S4.</b> The ESI-MS spectra and the extracted ion chromatograms (EICs) of the trypsin digestion products of the Mb induced by <i>D</i> -ribose for 0, 2 or 4 h. | P. S4 |
| <b>5. Table S1.</b> The relative errors in mass determination relative to the theoretical values as analyzed in Figure 2.                                                   | P. S5 |
| <b>6. Table S2.</b> The results of the peptide MS/MS analysis with PEAKS.                                                                                                   | P. S6 |

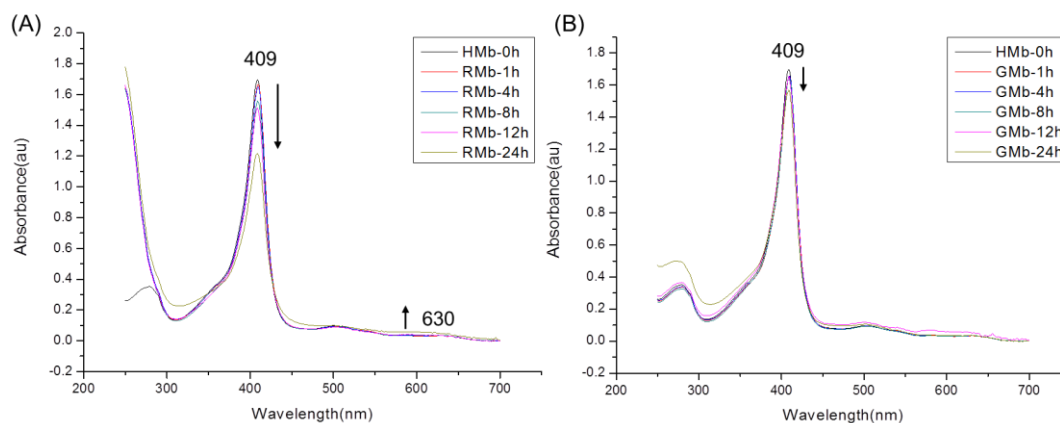

**Figure S1.** The UV-Vis spectra of HMB incubated with D-ribose (A) or D-glucose (B) (0.5 mM) at pH 7.0, 37 °C for 0-24 h.

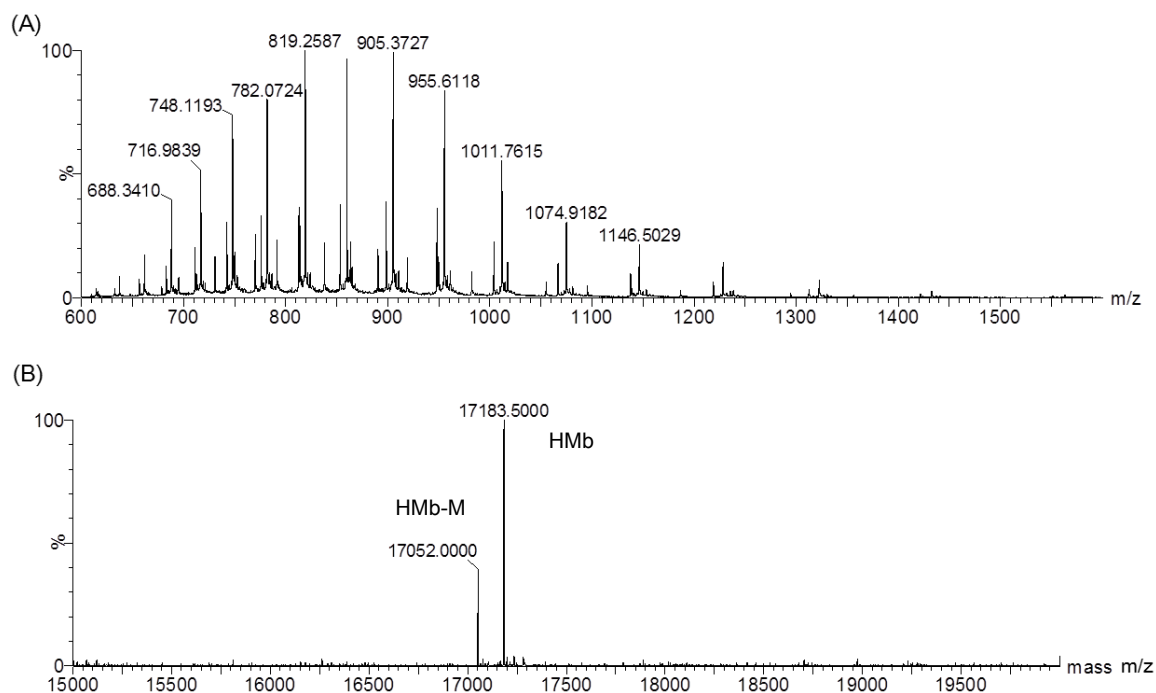

**Figure S2.** The ESI-MS spectrum of the expressed and purified HMB: (A) Original multiply-charged series. (B) The MaxEnt survey spectrum showing the major component. Calculated, 17184 Da; Observed,  $17183.5 \pm 0.5$  Da. The mass of 17052 Da is attributed to the absence of a Met residue (149 Da) at the N-terminus (termed HMB-M).

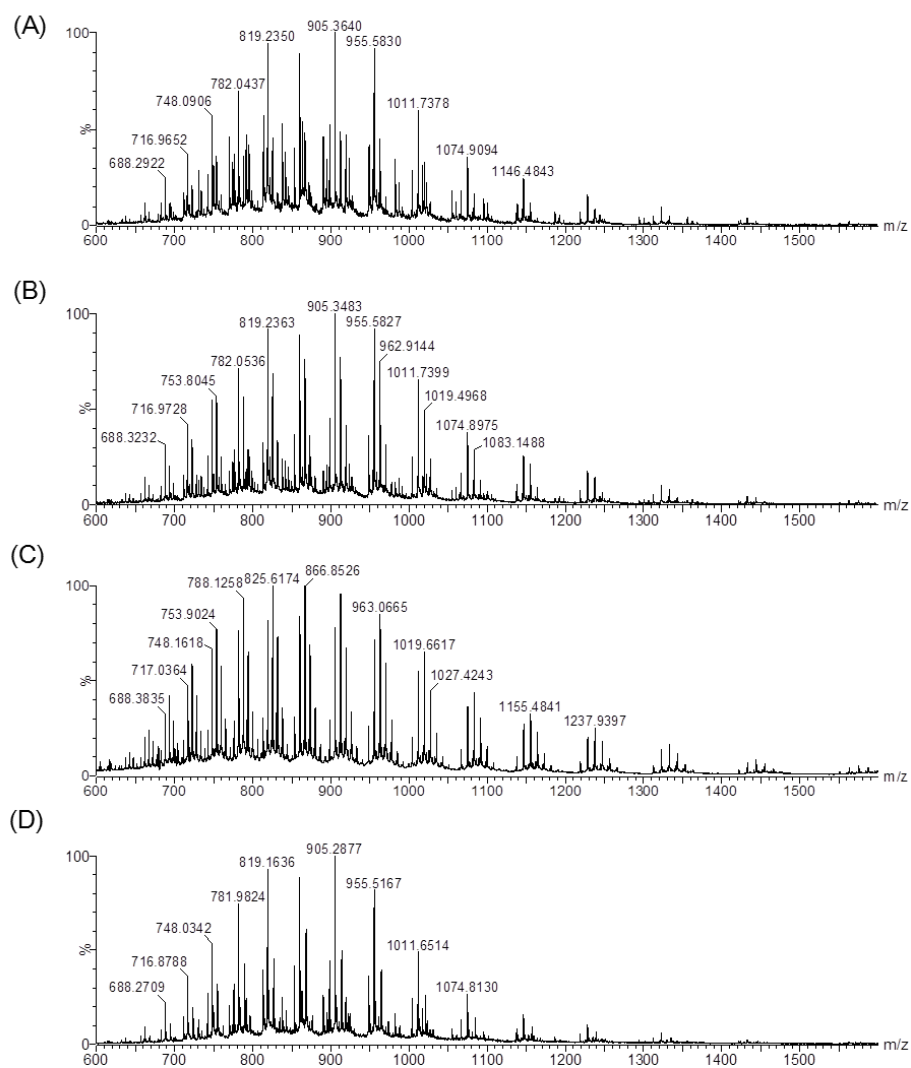

**Figure S3.** The original multiply-charged series in ESI-MS spectra of HMB after reacting with *D*-ribose for 1 h (A), 2 h (B), and 4 h (C), respectively. The spectrum of HMB after reacting with *D*-glucose for 24 h (D) was shown for comparison.

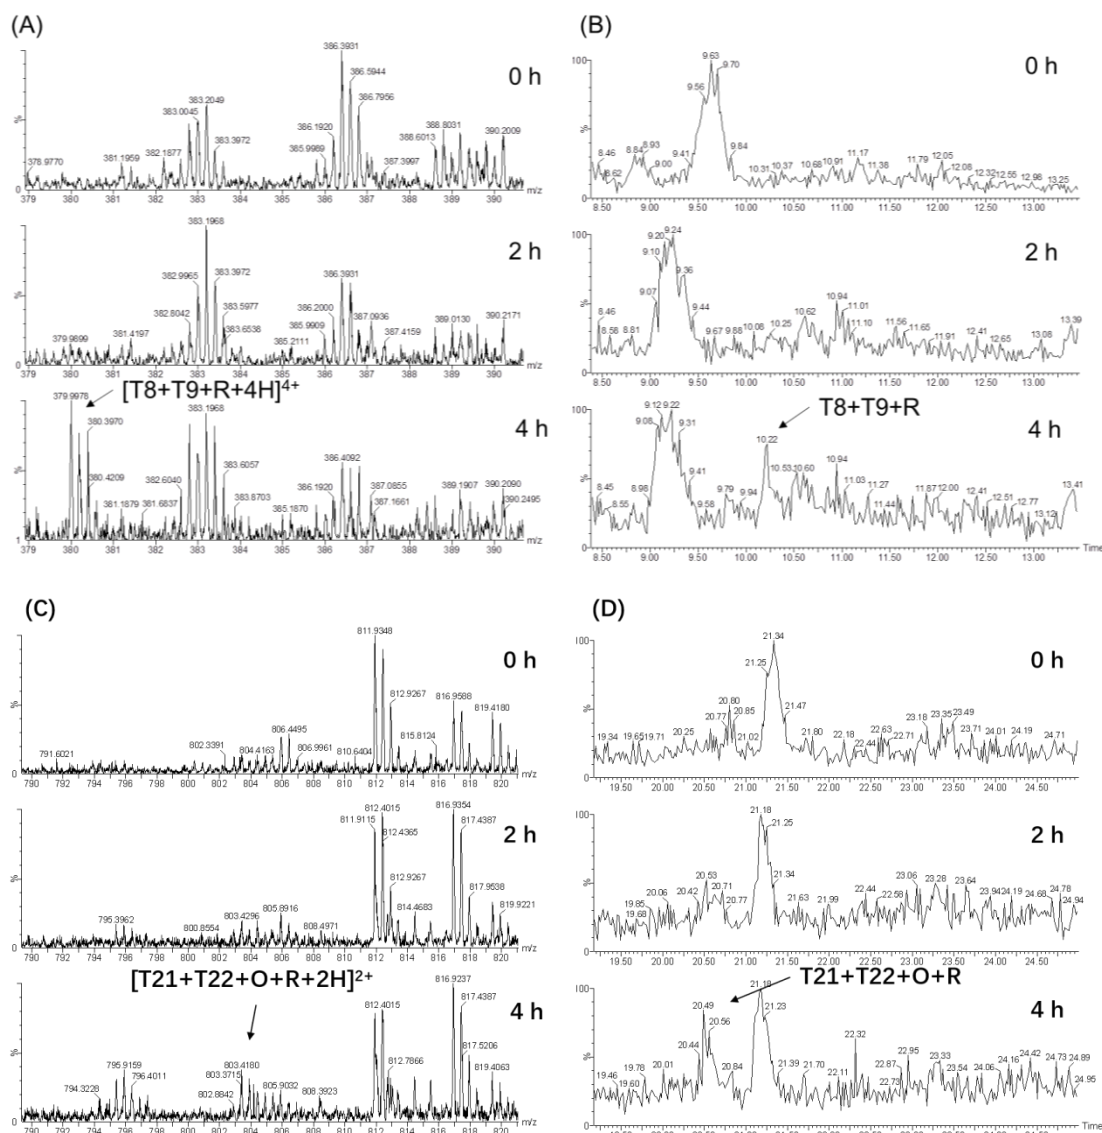

**Figure S4.** The ESI-MS spectra (A, C) and the extracted ion chromatograms (EICs) (B, D) of the trypsin digestion products of the HMb induced by *D*-ribose for 0, 2 and 4 h.

**Table S1.** The relative errors in mass determination relative to the theoretical values as analyzed in Figure 2.

| Time (hours) | Protein  | Ion m/z | Theoretical m/z | m/z error (ppm) |
|--------------|----------|---------|-----------------|-----------------|
| 1            | HMb      | 17183.0 | 17184           | -58             |
|              | HMb + 1R | 17315.0 | 17316           | -58             |
| 2            | HMb      | 17183.0 | 17184           | -58             |
|              | HMb + 1R | 17315.0 | 17316           | -58             |
|              | HMb + 2R | 17446.5 | 17448           | -86             |
| 4            | HMb      | 17183.5 | 17184           | -29             |
|              | HMb + 1R | 17315.5 | 17316           | -29             |
|              | HMb + 2R | 17447.5 | 17448           | -29             |
|              | HMb + 3R | 17579.5 | 17580           | -28             |
|              | HMb + 4R | 17711.5 | 17712           | -28             |
| 24           | HMb      | 17181.5 | 17184           | -145            |
|              | HMb + 1G | 17343.5 | 17346           | -144            |

**Table S2.** The results of the peptide MS/MS analysis with PEAKS.

| Peptide                  | mass      | m/z      | z | protein | ion    | ion m/z  | theoretical<br>m/z | m/z<br>error |
|--------------------------|-----------|----------|---|---------|--------|----------|--------------------|--------------|
| LFK(+132.04)GHPET<br>LEK | 1429.7429 | 715.8788 | 2 | P02144  | b2-H2O | 243.1342 | 243.1497           | 0.0156       |
| LFK(+132.04)GHPET<br>LEK | 1429.7429 | 715.8788 | 2 | P02144  | b7-H2O | 923.4473 | 923.4604           | 0.0131       |
| LFK(+132.04)GHPET<br>LEK | 1429.7429 | 715.8788 | 2 | P02144  | y1     | 147.1124 | 147.1128           | 0.0004       |
| LFK(+132.04)GHPET<br>LEK | 1429.7429 | 715.8788 | 2 | P02144  | y2     | 276.1548 | 276.1554           | 0.0005       |
| LFK(+132.04)GHPET<br>LEK | 1429.7429 | 715.8788 | 2 | P02144  | y3     | 389.2369 | 389.2394           | 0.0025       |
| LFK(+132.04)GHPET<br>LEK | 1429.7429 | 715.8788 | 2 | P02144  | y4     | 490.2859 | 490.2871           | 0.0013       |
| LFK(+132.04)GHPET<br>LEK | 1429.7429 | 715.8788 | 2 | P02144  | y5     | 619.3273 | 619.3297           | 0.0024       |
| LFK(+132.04)GHPET<br>LEK | 1429.7429 | 715.8788 | 2 | P02144  | y6     | 716.3804 | 716.3824           | 0.002        |
| LFK(+132.04)GHPET<br>LEK | 1429.7429 | 715.8788 | 2 | P02144  | y7     | 853.4365 | 853.4413           | 0.0049       |
| LFK(+132.04)GHPET<br>LEK | 1429.7429 | 715.8788 | 2 | P02144  | y8     | 910.4608 | 910.4628           | 0.002        |
| LFK(+132.04)GHPET<br>LEK | 1429.7429 | 715.8788 | 2 | P02144  | y1-H2O | 129.1019 | 129.1022           | 0.0004       |
| LFK(+132.04)GHPET<br>LEK | 1429.7429 | 715.8788 | 2 | P02144  | y2-H2O | 258.1442 | 258.1448           | 0.0006       |
| LFK(+132.04)GHPET<br>LEK | 1429.7429 | 715.8788 | 2 | P02144  | y6-H2O | 698.3727 | 698.3719           | -0.0009      |
| LFK(+132.04)GHPET<br>LEK | 1429.7429 | 715.8788 | 2 | P02144  | y7-H2O | 835.4315 | 835.4308           | -0.0007      |
| LFK(+132.04)GHPET<br>LEK | 1429.7429 | 715.8788 | 2 | P02144  | y8-H2O | 892.4529 | 892.4523           | -0.0006      |
| LFK(+132.04)GHPET<br>LEK | 1429.7429 | 715.8788 | 2 | P02144  | y1-NH3 | 130.0858 | 130.0858           | 0            |
| LFK(+132.04)GHPET<br>LEK | 1429.7429 | 715.8784 | 2 | P02144  | b2     | 261.1591 | 261.1603           | 0.0012       |
| LFK(+132.04)GHPET<br>LEK | 1429.7429 | 715.8784 | 2 | P02144  | b2-H2O | 243.1334 | 243.1497           | 0.0163       |
| LFK(+132.04)GHPET<br>LEK | 1429.7429 | 715.8784 | 2 | P02144  | b6-NH3 | 795.3954 | 795.4014           | 0.006        |
| LFK(+132.04)GHPET        | 1429.7429 | 715.8784 | 2 | P02144  | b3[2+] | 261.1591 | 261.1476           | -0.0115      |

|                          |           |          |   |        |        |               |           |         |
|--------------------------|-----------|----------|---|--------|--------|---------------|-----------|---------|
| LEK                      |           |          |   |        |        |               |           |         |
| LFK(+132.04)GHPET<br>LEK | 1429.7429 | 715.8784 | 2 | P02144 | y1     | 147.1125      | 147.1128  | 0.0003  |
| LFK(+132.04)GHPET<br>LEK | 1429.7429 | 715.8784 | 2 | P02144 | y2     | 276.1548      | 276.1554  | 0.0006  |
| LFK(+132.04)GHPET<br>LEK | 1429.7429 | 715.8784 | 2 | P02144 | y3     | 389.2386      | 389.2394  | 0.0008  |
| LFK(+132.04)GHPET<br>LEK | 1429.7429 | 715.8784 | 2 | P02144 | y4     | 490.286       | 490.2871  | 0.0011  |
| LFK(+132.04)GHPET<br>LEK | 1429.7429 | 715.8784 | 2 | P02144 | y5     | 619.3286      | 619.3297  | 0.0012  |
| LFK(+132.04)GHPET<br>LEK | 1429.7429 | 715.8784 | 2 | P02144 | y6     | 716.3802      | 716.3824  | 0.0022  |
| LFK(+132.04)GHPET<br>LEK | 1429.7429 | 715.8784 | 2 | P02144 | y7     | 853.438       | 853.4413  | 0.0034  |
| LFK(+132.04)GHPET<br>LEK | 1429.7429 | 715.8784 | 2 | P02144 | y8     | 910.4598      | 910.4628  | 0.003   |
| LFK(+132.04)GHPET<br>LEK | 1429.7429 | 715.8784 | 2 | P02144 | y9     | 1170.600<br>7 | 1170.5978 | -0.0029 |
| LFK(+132.04)GHPET<br>LEK | 1429.7429 | 715.8784 | 2 | P02144 | y1-H2O | 129.102       | 129.1022  | 0.0003  |
| LFK(+132.04)GHPET<br>LEK | 1429.7429 | 715.8784 | 2 | P02144 | y2-H2O | 258.1443      | 258.1448  | 0.0005  |
| LFK(+132.04)GHPET<br>LEK | 1429.7429 | 715.8784 | 2 | P02144 | y6-H2O | 698.3694      | 698.3719  | 0.0025  |
| LFK(+132.04)GHPET<br>LEK | 1429.7429 | 715.8784 | 2 | P02144 | y7-H2O | 835.4271      | 835.4308  | 0.0037  |
| LFK(+132.04)GHPET<br>LEK | 1429.7429 | 715.8784 | 2 | P02144 | y8-H2O | 892.4507      | 892.4523  | 0.0015  |
| LFK(+132.04)GHPET<br>LEK | 1429.7429 | 715.8784 | 2 | P02144 | y9-H2O | 1152.601<br>3 | 1152.5873 | -0.014  |
| LFK(+132.04)GHPET<br>LEK | 1429.7429 | 715.8784 | 2 | P02144 | y1-NH3 | 130.086       | 130.0858  | -0.0002 |
| LFK(+132.04)GHPET<br>LEK | 1429.7429 | 715.8784 | 2 | P02144 | y3-NH3 | 372.2292      | 372.2125  | -0.0168 |
| LFK(+132.04)GHPET<br>LEK | 1429.7429 | 715.8784 | 2 | P02144 | y7[2+] | 427.2237      | 427.2207  | -0.003  |
| LFK(+132.04)GHPET<br>LEK | 1429.7429 | 715.8784 | 2 | P02144 | y8[2+] | 455.7361      | 455.7314  | -0.0047 |
| LFK(+132.04)GHPET<br>LEK | 1429.7429 | 715.8785 | 2 | P02144 | b5-NH3 | 698.3676      | 698.3486  | -0.019  |
| LFK(+132.04)GHPET<br>LEK | 1429.7429 | 715.8785 | 2 | P02144 | y1     | 147.1121      | 147.1128  | 0.0007  |
| LFK(+132.04)GHPET        | 1429.7429 | 715.8785 | 2 | P02144 | y2     | 276.1551      | 276.1554  | 0.0002  |

|                          |           |          |   |        |        |          |          |         |
|--------------------------|-----------|----------|---|--------|--------|----------|----------|---------|
| LEK                      |           |          |   |        |        |          |          |         |
| LFK(+132.04)GHPET<br>LEK | 1429.7429 | 715.8785 | 2 | P02144 | y4     | 490.2854 | 490.2871 | 0.0017  |
| LFK(+132.04)GHPET<br>LEK | 1429.7429 | 715.8785 | 2 | P02144 | y6     | 716.3818 | 716.3824 | 0.0007  |
| LFK(+132.04)GHPET<br>LEK | 1429.7429 | 715.8785 | 2 | P02144 | y7     | 853.4426 | 853.4413 | -0.0013 |
| LFK(+132.04)GHPET<br>LEK | 1429.7429 | 715.8785 | 2 | P02144 | y8     | 910.4641 | 910.4628 | -0.0012 |
| LFK(+132.04)GHPET<br>LEK | 1429.7429 | 715.8785 | 2 | P02144 | y1-H2O | 129.1021 | 129.1022 | 0.0002  |
| LFK(+132.04)GHPET<br>LEK | 1429.7429 | 715.8785 | 2 | P02144 | y6-H2O | 698.3676 | 698.3719 | 0.0043  |
| LFK(+132.04)GHPET<br>LEK | 1429.7429 | 715.8784 | 2 | P02144 | b2     | 261.1588 | 261.1603 | 0.0015  |
| LFK(+132.04)GHPET<br>LEK | 1429.7429 | 715.8784 | 2 | P02144 | b2-H2O | 243.1337 | 243.1497 | 0.016   |
| LFK(+132.04)GHPET<br>LEK | 1429.7429 | 715.8784 | 2 | P02144 | b3[2+] | 261.1588 | 261.1476 | -0.0111 |
| LFK(+132.04)GHPET<br>LEK | 1429.7429 | 715.8784 | 2 | P02144 | y1     | 147.1125 | 147.1128 | 0.0003  |
| LFK(+132.04)GHPET<br>LEK | 1429.7429 | 715.8784 | 2 | P02144 | y2     | 276.1549 | 276.1554 | 0.0004  |
| LFK(+132.04)GHPET<br>LEK | 1429.7429 | 715.8784 | 2 | P02144 | y3     | 389.2391 | 389.2394 | 0.0003  |
| LFK(+132.04)GHPET<br>LEK | 1429.7429 | 715.8784 | 2 | P02144 | y4     | 490.2862 | 490.2871 | 0.0009  |
| LFK(+132.04)GHPET<br>LEK | 1429.7429 | 715.8784 | 2 | P02144 | y5     | 619.3289 | 619.3297 | 0.0009  |
| LFK(+132.04)GHPET<br>LEK | 1429.7429 | 715.8784 | 2 | P02144 | y6     | 716.381  | 716.3824 | 0.0015  |
| LFK(+132.04)GHPET<br>LEK | 1429.7429 | 715.8784 | 2 | P02144 | y7     | 853.4386 | 853.4413 | 0.0027  |
| LFK(+132.04)GHPET<br>LEK | 1429.7429 | 715.8784 | 2 | P02144 | y8     | 910.4609 | 910.4628 | 0.002   |
| LFK(+132.04)GHPET<br>LEK | 1429.7429 | 715.8784 | 2 | P02144 | y1-H2O | 129.102  | 129.1022 | 0.0002  |
| LFK(+132.04)GHPET<br>LEK | 1429.7429 | 715.8784 | 2 | P02144 | y2-H2O | 258.1443 | 258.1448 | 0.0005  |
| LFK(+132.04)GHPET<br>LEK | 1429.7429 | 715.8784 | 2 | P02144 | y6-H2O | 698.3703 | 698.3719 | 0.0016  |
| LFK(+132.04)GHPET<br>LEK | 1429.7429 | 715.8784 | 2 | P02144 | y7-H2O | 835.4309 | 835.4308 | -0.0001 |
| LFK(+132.04)GHPET        | 1429.7429 | 715.8784 | 2 | P02144 | y8-H2O | 892.4509 | 892.4523 | 0.0014  |



|                          |           |          |   |        |        |          |          |         |  |
|--------------------------|-----------|----------|---|--------|--------|----------|----------|---------|--|
| LEK                      |           |          |   |        |        |          |          |         |  |
| LFK(+132.04)GHPET<br>LEK | 1429.7429 | 715.8784 | 2 | P02144 | y1-NH3 | 130.086  | 130.0858 | -0.0002 |  |
| LFK(+132.04)GHPET<br>LEK | 1429.7429 | 715.8783 | 2 | P02144 | y1     | 147.1125 | 147.1128 | 0.0003  |  |
| LFK(+132.04)GHPET<br>LEK | 1429.7429 | 715.8783 | 2 | P02144 | y2     | 276.1559 | 276.1554 | -0.0006 |  |
| LFK(+132.04)GHPET<br>LEK | 1429.7429 | 715.8783 | 2 | P02144 | y3     | 389.2363 | 389.2394 | 0.0031  |  |
| LFK(+132.04)GHPET<br>LEK | 1429.7429 | 715.8783 | 2 | P02144 | y4     | 490.2863 | 490.2871 | 0.0008  |  |
| LFK(+132.04)GHPET<br>LEK | 1429.7429 | 715.8783 | 2 | P02144 | y6     | 716.3812 | 716.3824 | 0.0012  |  |
| LFK(+132.04)GHPET<br>LEK | 1429.7429 | 715.8783 | 2 | P02144 | y8     | 910.4604 | 910.4628 | 0.0024  |  |
| LFK(+132.04)GHPET<br>LEK | 1429.7429 | 715.8783 | 2 | P02144 | y1-H2O | 129.102  | 129.1022 | 0.0003  |  |
| LFK(+132.04)GHPET<br>LEK | 1429.7429 | 715.8783 | 2 | P02144 | y1-NH3 | 130.086  | 130.0858 | -0.0002 |  |
| LFK(+132.04)GHPET<br>LEK | 1429.7429 | 715.8788 | 2 | P02144 | y1     | 147.1128 | 147.1128 | 0       |  |
| LFK(+132.04)GHPET<br>LEK | 1429.7429 | 715.8788 | 2 | P02144 | y3     | 389.2379 | 389.2394 | 0.0015  |  |
| LFK(+132.04)GHPET<br>LEK | 1429.7429 | 715.8788 | 2 | P02144 | y4     | 490.2853 | 490.2871 | 0.0018  |  |
| LFK(+132.04)GHPET<br>LEK | 1429.7429 | 715.8788 | 2 | P02144 | y6     | 716.3806 | 716.3824 | 0.0019  |  |
| LFK(+132.04)GHPET<br>LEK | 1429.7429 | 715.8788 | 2 | P02144 | y8     | 910.4568 | 910.4628 | 0.006   |  |
| LFK(+132.04)GHPET<br>LEK | 1429.7429 | 715.8788 | 2 | P02144 | y1-H2O | 129.1021 | 129.1022 | 0.0002  |  |
| LFK(+132.04)GHPET<br>LEK | 1429.7429 | 715.8788 | 2 | P02144 | y2-H2O | 258.1447 | 258.1448 | 0.0001  |  |
| LFK(+132.04)GHPET<br>LEK | 1429.7429 | 715.8788 | 2 | P02144 | y1-NH3 | 130.0858 | 130.0858 | 0       |  |
| LFK(+132.04)GHPET<br>LEK | 1429.7429 | 715.8777 | 2 | P02144 | y1     | 147.1125 | 147.1128 | 0.0003  |  |
| LFK(+132.04)GHPET<br>LEK | 1429.7429 | 715.8777 | 2 | P02144 | y2     | 276.1549 | 276.1554 | 0.0004  |  |
| LFK(+132.04)GHPET<br>LEK | 1429.7429 | 715.8777 | 2 | P02144 | y3     | 389.2395 | 389.2394 | -0.0001 |  |
| LFK(+132.04)GHPET<br>LEK | 1429.7429 | 715.8777 | 2 | P02144 | y4     | 490.2871 | 490.2871 | 0       |  |
| LFK(+132.04)GHPET        | 1429.7429 | 715.8777 | 2 | P02144 | y6     | 716.3821 | 716.3824 | 0.0003  |  |

|                          |           |          |   |        |        |          |          |         |  |
|--------------------------|-----------|----------|---|--------|--------|----------|----------|---------|--|
| LEK                      |           |          |   |        |        |          |          |         |  |
| LFK(+132.04)GHPET<br>LEK | 1429.7429 | 715.8777 | 2 | P02144 | y7     | 853.4407 | 853.4413 | 0.0007  |  |
| LFK(+132.04)GHPET<br>LEK | 1429.7429 | 715.8777 | 2 | P02144 | y8     | 910.4648 | 910.4628 | -0.002  |  |
| LFK(+132.04)GHPET<br>LEK | 1429.7429 | 715.8777 | 2 | P02144 | y1-H2O | 129.1021 | 129.1022 | 0.0002  |  |
| LFK(+132.04)GHPET<br>LEK | 1429.7429 | 715.8777 | 2 | P02144 | y2-H2O | 258.1446 | 258.1448 | 0.0002  |  |
| LFK(+132.04)GHPET<br>LEK | 1429.7429 | 715.8777 | 2 | P02144 | y6-H2O | 698.3724 | 698.3719 | -0.0005 |  |
| LFK(+132.04)GHPET<br>LEK | 1429.7429 | 715.8777 | 2 | P02144 | y1-NH3 | 130.086  | 130.0858 | -0.0002 |  |
| LFK(+132.04)GHPET<br>LEK | 1429.7429 | 715.8777 | 2 | P02144 | y2-NH3 | 259.1284 | 259.1284 | 0       |  |
| LFK(+132.04)GHPET<br>LEK | 1429.7429 | 477.588  | 3 | P02144 | b2     | 261.1592 | 261.1603 | 0.001   |  |
| LFK(+132.04)GHPET<br>LEK | 1429.7429 | 477.588  | 3 | P02144 | b2-H2O | 243.1332 | 243.1497 | 0.0165  |  |
| LFK(+132.04)GHPET<br>LEK | 1429.7429 | 477.588  | 3 | P02144 | b5-H2O | 697.3554 | 697.3651 | 0.0096  |  |
| LFK(+132.04)GHPET<br>LEK | 1429.7429 | 477.588  | 3 | P02144 | b7-H2O | 923.4412 | 923.4604 | 0.0192  |  |
| LFK(+132.04)GHPET<br>LEK | 1429.7429 | 477.588  | 3 | P02144 | b3[2+] | 261.1592 | 261.1476 | -0.0116 |  |
| LFK(+132.04)GHPET<br>LEK | 1429.7429 | 477.588  | 3 | P02144 | y1     | 147.1125 | 147.1128 | 0.0003  |  |
| LFK(+132.04)GHPET<br>LEK | 1429.7429 | 477.588  | 3 | P02144 | y2     | 276.1546 | 276.1554 | 0.0007  |  |
| LFK(+132.04)GHPET<br>LEK | 1429.7429 | 477.588  | 3 | P02144 | y3     | 389.2383 | 389.2394 | 0.0011  |  |
| LFK(+132.04)GHPET<br>LEK | 1429.7429 | 477.588  | 3 | P02144 | y4     | 490.2858 | 490.2871 | 0.0013  |  |
| LFK(+132.04)GHPET<br>LEK | 1429.7429 | 477.588  | 3 | P02144 | y5     | 619.3278 | 619.3297 | 0.0019  |  |
| LFK(+132.04)GHPET<br>LEK | 1429.7429 | 477.588  | 3 | P02144 | y6     | 716.3801 | 716.3824 | 0.0024  |  |
| LFK(+132.04)GHPET<br>LEK | 1429.7429 | 477.588  | 3 | P02144 | y7     | 853.4397 | 853.4413 | 0.0016  |  |
| LFK(+132.04)GHPET<br>LEK | 1429.7429 | 477.588  | 3 | P02144 | y8     | 910.4608 | 910.4628 | 0.0021  |  |
| LFK(+132.04)GHPET<br>LEK | 1429.7429 | 477.588  | 3 | P02144 | y1-H2O | 129.1019 | 129.1022 | 0.0003  |  |
| LFK(+132.04)GHPET        | 1429.7429 | 477.588  | 3 | P02144 | y2-H2O | 258.1442 | 258.1448 | 0.0006  |  |

|                          |           |          |   |        |        |          |          |         |  |
|--------------------------|-----------|----------|---|--------|--------|----------|----------|---------|--|
| LEK                      |           |          |   |        |        |          |          |         |  |
| LFK(+132.04)GHPET<br>LEK | 1429.7429 | 477.588  | 3 | P02144 | y5-H2O | 601.317  | 601.3192 | 0.0022  |  |
| LFK(+132.04)GHPET<br>LEK | 1429.7429 | 477.588  | 3 | P02144 | y6-H2O | 698.3702 | 698.3719 | 0.0017  |  |
| LFK(+132.04)GHPET<br>LEK | 1429.7429 | 477.588  | 3 | P02144 | y8-H2O | 892.4521 | 892.4523 | 0.0002  |  |
| LFK(+132.04)GHPET<br>LEK | 1429.7429 | 477.588  | 3 | P02144 | y1-NH3 | 130.086  | 130.0858 | -0.0002 |  |
| LFK(+132.04)GHPET<br>LEK | 1429.7429 | 358.4427 | 4 | P02144 | b2-H2O | 243.1337 | 243.1497 | 0.016   |  |
| LFK(+132.04)GHPET<br>LEK | 1429.7429 | 358.4427 | 4 | P02144 | y1     | 147.1126 | 147.1128 | 0.0002  |  |
| LFK(+132.04)GHPET<br>LEK | 1429.7429 | 358.4427 | 4 | P02144 | y2     | 276.1551 | 276.1554 | 0.0003  |  |
| LFK(+132.04)GHPET<br>LEK | 1429.7429 | 358.4427 | 4 | P02144 | y3     | 389.2389 | 389.2394 | 0.0005  |  |
| LFK(+132.04)GHPET<br>LEK | 1429.7429 | 358.4427 | 4 | P02144 | y4     | 490.2865 | 490.2871 | 0.0006  |  |
| LFK(+132.04)GHPET<br>LEK | 1429.7429 | 358.4427 | 4 | P02144 | y5     | 619.3285 | 619.3297 | 0.0012  |  |
| LFK(+132.04)GHPET<br>LEK | 1429.7429 | 358.4427 | 4 | P02144 | y6     | 716.3809 | 716.3824 | 0.0015  |  |
| LFK(+132.04)GHPET<br>LEK | 1429.7429 | 358.4427 | 4 | P02144 | y8     | 910.4658 | 910.4628 | -0.003  |  |
| LFK(+132.04)GHPET<br>LEK | 1429.7429 | 358.4427 | 4 | P02144 | y1-H2O | 129.1021 | 129.1022 | 0.0002  |  |
| LFK(+132.04)GHPET<br>LEK | 1429.7429 | 358.4427 | 4 | P02144 | y2-H2O | 258.1445 | 258.1448 | 0.0003  |  |
| LFK(+132.04)GHPET<br>LEK | 1429.7429 | 358.4427 | 4 | P02144 | y4-H2O | 472.2763 | 472.2766 | 0.0003  |  |
| LFK(+132.04)GHPET<br>LEK | 1429.7429 | 358.4427 | 4 | P02144 | y5-H2O | 601.3183 | 601.3192 | 0.0009  |  |
| LFK(+132.04)GHPET<br>LEK | 1429.7429 | 358.4427 | 4 | P02144 | y6-H2O | 698.3707 | 698.3719 | 0.0012  |  |
| LFK(+132.04)GHPET<br>LEK | 1429.7429 | 358.4427 | 4 | P02144 | y1-NH3 | 130.0861 | 130.0858 | -0.0003 |  |
| LFK(+132.04)GHPET<br>LEK | 1429.7429 | 358.4427 | 4 | P02144 | y3[2+] | 195.1125 | 195.1197 | 0.0072  |  |
| LFK(+132.04)GHPET<br>LEK | 1429.7429 | 477.588  | 3 | P02144 | b2     | 261.1587 | 261.1603 | 0.0016  |  |
| LFK(+132.04)GHPET<br>LEK | 1429.7429 | 477.588  | 3 | P02144 | b2-H2O | 243.1337 | 243.1497 | 0.0161  |  |
| LFK(+132.04)GHPET        | 1429.7429 | 477.588  | 3 | P02144 | b7-H2O | 923.446  | 923.4604 | 0.0144  |  |

|                          |           |         |   |        |        |          |          |         |  |
|--------------------------|-----------|---------|---|--------|--------|----------|----------|---------|--|
| LEK                      |           |         |   |        |        |          |          |         |  |
| LFK(+132.04)GHPET<br>LEK | 1429.7429 | 477.588 | 3 | P02144 | b3[2+] | 261.1587 | 261.1476 | -0.011  |  |
| LFK(+132.04)GHPET<br>LEK | 1429.7429 | 477.588 | 3 | P02144 | y1     | 147.1125 | 147.1128 | 0.0002  |  |
| LFK(+132.04)GHPET<br>LEK | 1429.7429 | 477.588 | 3 | P02144 | y2     | 276.1548 | 276.1554 | 0.0005  |  |
| LFK(+132.04)GHPET<br>LEK | 1429.7429 | 477.588 | 3 | P02144 | y3     | 389.2382 | 389.2394 | 0.0012  |  |
| LFK(+132.04)GHPET<br>LEK | 1429.7429 | 477.588 | 3 | P02144 | y4     | 490.2862 | 490.2871 | 0.0009  |  |
| LFK(+132.04)GHPET<br>LEK | 1429.7429 | 477.588 | 3 | P02144 | y5     | 619.3281 | 619.3297 | 0.0016  |  |
| LFK(+132.04)GHPET<br>LEK | 1429.7429 | 477.588 | 3 | P02144 | y6     | 716.3803 | 716.3824 | 0.0021  |  |
| LFK(+132.04)GHPET<br>LEK | 1429.7429 | 477.588 | 3 | P02144 | y8     | 910.4598 | 910.4628 | 0.003   |  |
| LFK(+132.04)GHPET<br>LEK | 1429.7429 | 477.588 | 3 | P02144 | y1-H2O | 129.102  | 129.1022 | 0.0002  |  |
| LFK(+132.04)GHPET<br>LEK | 1429.7429 | 477.588 | 3 | P02144 | y2-H2O | 258.1443 | 258.1448 | 0.0005  |  |
| LFK(+132.04)GHPET<br>LEK | 1429.7429 | 477.588 | 3 | P02144 | y6-H2O | 698.3687 | 698.3719 | 0.0032  |  |
| LFK(+132.04)GHPET<br>LEK | 1429.7429 | 477.588 | 3 | P02144 | y8-H2O | 892.4509 | 892.4523 | 0.0013  |  |
| LFK(+132.04)GHPET<br>LEK | 1429.7429 | 477.588 | 3 | P02144 | y1-NH3 | 130.086  | 130.0858 | -0.0003 |  |
| LFK(+132.04)GHPET<br>LEK | 1429.7429 | 477.588 | 3 | P02144 | y5-NH3 | 602.3153 | 602.3027 | -0.0126 |  |
| LFK(+132.04)GHPET<br>LEK | 1429.7429 | 477.588 | 3 | P02144 | y6-NH3 | 699.3717 | 699.3555 | -0.0162 |  |
| LFK(+132.04)GHPET<br>LEK | 1429.7429 | 477.588 | 3 | P02144 | y8-NH3 | 893.454  | 893.4359 | -0.0182 |  |
| LFK(+132.04)GHPET<br>LEK | 1429.7429 | 477.588 | 3 | P02144 | y3[2+] | 195.1107 | 195.1197 | 0.009   |  |
| LFK(+132.04)GHPET<br>LEK | 1429.7429 | 715.878 | 2 | P02144 | y1     | 147.1125 | 147.1128 | 0.0003  |  |
| LFK(+132.04)GHPET<br>LEK | 1429.7429 | 715.878 | 2 | P02144 | y2     | 276.1559 | 276.1554 | -0.0006 |  |
| LFK(+132.04)GHPET<br>LEK | 1429.7429 | 715.878 | 2 | P02144 | y3     | 389.2363 | 389.2394 | 0.0031  |  |
| LFK(+132.04)GHPET<br>LEK | 1429.7429 | 715.878 | 2 | P02144 | y4     | 490.2863 | 490.2871 | 0.0008  |  |
| LFK(+132.04)GHPET        | 1429.7429 | 715.878 | 2 | P02144 | y6     | 716.3812 | 716.3824 | 0.0012  |  |

|                          |           |          |   |        |        |          |          |         |  |
|--------------------------|-----------|----------|---|--------|--------|----------|----------|---------|--|
| LEK                      |           |          |   |        |        |          |          |         |  |
| LFK(+132.04)GHPET<br>LEK | 1429.7429 | 715.878  | 2 | P02144 | y8     | 910.4604 | 910.4628 | 0.0024  |  |
| LFK(+132.04)GHPET<br>LEK | 1429.7429 | 715.878  | 2 | P02144 | y1-H2O | 129.102  | 129.1022 | 0.0003  |  |
| LFK(+132.04)GHPET<br>LEK | 1429.7429 | 715.878  | 2 | P02144 | y1-NH3 | 130.086  | 130.0858 | -0.0002 |  |
| LFK(+132.04)GHPET<br>LEK | 1429.7429 | 477.588  | 3 | P02144 | b2-H2O | 243.1337 | 243.1497 | 0.0161  |  |
| LFK(+132.04)GHPET<br>LEK | 1429.7429 | 477.588  | 3 | P02144 | y1     | 147.1125 | 147.1128 | 0.0003  |  |
| LFK(+132.04)GHPET<br>LEK | 1429.7429 | 477.588  | 3 | P02144 | y2     | 276.1549 | 276.1554 | 0.0004  |  |
| LFK(+132.04)GHPET<br>LEK | 1429.7429 | 477.588  | 3 | P02144 | y3     | 389.2388 | 389.2394 | 0.0007  |  |
| LFK(+132.04)GHPET<br>LEK | 1429.7429 | 477.588  | 3 | P02144 | y4     | 490.2865 | 490.2871 | 0.0006  |  |
| LFK(+132.04)GHPET<br>LEK | 1429.7429 | 477.588  | 3 | P02144 | y5     | 619.3281 | 619.3297 | 0.0016  |  |
| LFK(+132.04)GHPET<br>LEK | 1429.7429 | 477.588  | 3 | P02144 | y6     | 716.3815 | 716.3824 | 0.0009  |  |
| LFK(+132.04)GHPET<br>LEK | 1429.7429 | 477.588  | 3 | P02144 | y8     | 910.4656 | 910.4628 | -0.0028 |  |
| LFK(+132.04)GHPET<br>LEK | 1429.7429 | 477.588  | 3 | P02144 | y1-H2O | 129.102  | 129.1022 | 0.0002  |  |
| LFK(+132.04)GHPET<br>LEK | 1429.7429 | 477.588  | 3 | P02144 | y2-H2O | 258.1443 | 258.1448 | 0.0005  |  |
| LFK(+132.04)GHPET<br>LEK | 1429.7429 | 477.588  | 3 | P02144 | y5-H2O | 601.3194 | 601.3192 | -0.0002 |  |
| LFK(+132.04)GHPET<br>LEK | 1429.7429 | 477.588  | 3 | P02144 | y8-H2O | 892.4498 | 892.4523 | 0.0025  |  |
| LFK(+132.04)GHPET<br>LEK | 1429.7429 | 477.588  | 3 | P02144 | y1-NH3 | 130.086  | 130.0858 | -0.0003 |  |
| LFK(+132.04)GHPET<br>LEK | 1429.7429 | 715.8787 | 2 | P02144 | y1     | 147.1124 | 147.1128 | 0.0004  |  |
| LFK(+132.04)GHPET<br>LEK | 1429.7429 | 715.8787 | 2 | P02144 | y2     | 276.1558 | 276.1554 | -0.0005 |  |
| LFK(+132.04)GHPET<br>LEK | 1429.7429 | 715.8787 | 2 | P02144 | y3     | 389.2398 | 389.2394 | -0.0003 |  |
| LFK(+132.04)GHPET<br>LEK | 1429.7429 | 715.8787 | 2 | P02144 | y4     | 490.2858 | 490.2871 | 0.0013  |  |
| LFK(+132.04)GHPET<br>LEK | 1429.7429 | 715.8787 | 2 | P02144 | y6     | 716.3832 | 716.3824 | -0.0007 |  |
| LFK(+132.04)GHPET        | 1429.7429 | 715.8787 | 2 | P02144 | y1-H2O | 129.102  | 129.1022 | 0.0002  |  |

|                          |           |          |   |        |        |          |          |         |  |
|--------------------------|-----------|----------|---|--------|--------|----------|----------|---------|--|
| LEK                      |           |          |   |        |        |          |          |         |  |
| LFK(+132.04)GHPET<br>LEK | 1429.7429 | 715.8787 | 2 | P02144 | y2-H2O | 258.1444 | 258.1448 | 0.0004  |  |
| LFK(+132.04)GHPET<br>LEK | 1429.7429 | 477.5881 | 3 | P02144 | b2-H2O | 243.1341 | 243.1497 | 0.0156  |  |
| LFK(+132.04)GHPET<br>LEK | 1429.7429 | 477.5881 | 3 | P02144 | b3[2+] | 261.1383 | 261.1476 | 0.0093  |  |
| LFK(+132.04)GHPET<br>LEK | 1429.7429 | 477.5881 | 3 | P02144 | y1     | 147.1126 | 147.1128 | 0.0002  |  |
| LFK(+132.04)GHPET<br>LEK | 1429.7429 | 477.5881 | 3 | P02144 | y2     | 276.1554 | 276.1554 | 0       |  |
| LFK(+132.04)GHPET<br>LEK | 1429.7429 | 477.5881 | 3 | P02144 | y3     | 389.2384 | 389.2394 | 0.001   |  |
| LFK(+132.04)GHPET<br>LEK | 1429.7429 | 477.5881 | 3 | P02144 | y4     | 490.2872 | 490.2871 | -0.0001 |  |
| LFK(+132.04)GHPET<br>LEK | 1429.7429 | 477.5881 | 3 | P02144 | y5     | 619.3297 | 619.3297 | 0.0001  |  |
| LFK(+132.04)GHPET<br>LEK | 1429.7429 | 477.5881 | 3 | P02144 | y6     | 716.3829 | 716.3824 | -0.0005 |  |
| LFK(+132.04)GHPET<br>LEK | 1429.7429 | 477.5881 | 3 | P02144 | y8     | 910.4598 | 910.4628 | 0.003   |  |
| LFK(+132.04)GHPET<br>LEK | 1429.7429 | 477.5881 | 3 | P02144 | y1-H2O | 129.102  | 129.1022 | 0.0002  |  |
| LFK(+132.04)GHPET<br>LEK | 1429.7429 | 477.5881 | 3 | P02144 | y2-H2O | 258.1444 | 258.1448 | 0.0004  |  |
| LFK(+132.04)GHPET<br>LEK | 1429.7429 | 477.5881 | 3 | P02144 | y6-H2O | 698.3729 | 698.3719 | -0.001  |  |
| LFK(+132.04)GHPET<br>LEK | 1429.7429 | 477.5881 | 3 | P02144 | y1-NH3 | 130.086  | 130.0858 | -0.0003 |  |
| LFK(+132.04)GHPET<br>LEK | 1429.7429 | 715.877  | 2 | P02144 | b5     | 715.362  | 715.3756 | 0.0136  |  |
| LFK(+132.04)GHPET<br>LEK | 1429.7429 | 715.877  | 2 | P02144 | y1     | 147.1126 | 147.1128 | 0.0002  |  |
| LFK(+132.04)GHPET<br>LEK | 1429.7429 | 715.877  | 2 | P02144 | y4     | 490.285  | 490.2871 | 0.0021  |  |
| LFK(+132.04)GHPET<br>LEK | 1429.7429 | 715.877  | 2 | P02144 | y6     | 716.3819 | 716.3824 | 0.0005  |  |
| LFK(+132.04)GHPET<br>LEK | 1429.7429 | 715.877  | 2 | P02144 | y8     | 910.4615 | 910.4628 | 0.0013  |  |
| LFK(+132.04)GHPET<br>LEK | 1429.7429 | 715.877  | 2 | P02144 | y1-H2O | 129.1021 | 129.1022 | 0.0002  |  |
| LFK(+132.04)GHPET<br>LEK | 1429.7429 | 715.877  | 2 | P02144 | y2-H2O | 258.1439 | 258.1448 | 0.0009  |  |
| LFK(+132.04)GHPET        | 1429.7429 | 715.877  | 2 | P02144 | y6-H2O | 698.3732 | 698.3719 | -0.0013 |  |

|                                |           |          |   |        |        |          |          |         |  |
|--------------------------------|-----------|----------|---|--------|--------|----------|----------|---------|--|
| LEK                            |           |          |   |        |        |          |          |         |  |
| LFK(+132.04)GHPET<br>LEK       | 1429.7429 | 477.5879 | 3 | P02144 | y1     | 147.1126 | 147.1128 | 0.0002  |  |
| LFK(+132.04)GHPET<br>LEK       | 1429.7429 | 477.5879 | 3 | P02144 | y2     | 276.1547 | 276.1554 | 0.0007  |  |
| LFK(+132.04)GHPET<br>LEK       | 1429.7429 | 477.5879 | 3 | P02144 | y4     | 490.2868 | 490.2871 | 0.0003  |  |
| LFK(+132.04)GHPET<br>LEK       | 1429.7429 | 477.5879 | 3 | P02144 | y5     | 619.3288 | 619.3297 | 0.0009  |  |
| LFK(+132.04)GHPET<br>LEK       | 1429.7429 | 477.5879 | 3 | P02144 | y6     | 716.3802 | 716.3824 | 0.0022  |  |
| LFK(+132.04)GHPET<br>LEK       | 1429.7429 | 477.5879 | 3 | P02144 | y8     | 910.455  | 910.4628 | 0.0078  |  |
| LFK(+132.04)GHPET<br>LEK       | 1429.7429 | 477.5879 | 3 | P02144 | y1-H2O | 129.102  | 129.1022 | 0.0002  |  |
| LFK(+132.04)GHPET<br>LEK       | 1429.7429 | 477.5879 | 3 | P02144 | y2-H2O | 258.1438 | 258.1448 | 0.001   |  |
| LFK(+132.04)GHPET<br>LEK       | 1429.7429 | 477.5879 | 3 | P02144 | y1-NH3 | 130.086  | 130.0858 | -0.0002 |  |
| GHHEAEIK(+132.04)<br>PLAQSHATK | 1984.9944 | 993.5029 | 2 | P02144 | b2     | 195.087  | 195.0882 | 0.0012  |  |
| GHHEAEIK(+132.04)<br>PLAQSHATK | 1984.9944 | 993.5029 | 2 | P02144 | b3     | 332.1456 | 332.1471 | 0.0015  |  |
| GHHEAEIK(+132.04)<br>PLAQSHATK | 1984.9944 | 993.5029 | 2 | P02144 | b4     | 461.1879 | 461.1897 | 0.0018  |  |
| GHHEAEIK(+132.04)<br>PLAQSHATK | 1984.9944 | 993.5029 | 2 | P02144 | b5     | 532.2253 | 532.2268 | 0.0015  |  |
| GHHEAEIK(+132.04)<br>PLAQSHATK | 1984.9944 | 993.5029 | 2 | P02144 | b6     | 661.2671 | 661.2694 | 0.0023  |  |
| GHHEAEIK(+132.04)<br>PLAQSHATK | 1984.9944 | 993.5029 | 2 | P02144 | b7     | 774.3525 | 774.3535 | 0.001   |  |
| GHHEAEIK(+132.04)<br>PLAQSHATK | 1984.9944 | 993.5029 | 2 | P02144 | b3-H2O | 314.1353 | 314.1365 | 0.0013  |  |
| GHHEAEIK(+132.04)<br>PLAQSHATK | 1984.9944 | 993.5029 | 2 | P02144 | b4-H2O | 443.1789 | 443.1791 | 0.0002  |  |
| GHHEAEIK(+132.04)<br>PLAQSHATK | 1984.9944 | 993.5029 | 2 | P02144 | b5-H2O | 514.2141 | 514.2162 | 0.0022  |  |
| GHHEAEIK(+132.04)<br>PLAQSHATK | 1984.9944 | 993.5029 | 2 | P02144 | b6-H2O | 643.2568 | 643.2589 | 0.002   |  |
| GHHEAEIK(+132.04)<br>PLAQSHATK | 1984.9944 | 993.5029 | 2 | P02144 | b7-H2O | 756.3328 | 756.3429 | 0.0101  |  |
| GHHEAEIK(+132.04)<br>PLAQSHATK | 1984.9944 | 993.5029 | 2 | P02144 | b2-NH3 | 178.0608 | 178.0612 | 0.0004  |  |
| GHHEAEIK(+132.04)              | 1984.9944 | 993.5029 | 2 | P02144 | y2     | 248.1602 | 248.1605 | 0.0003  |  |

|                   |           |          |   |        |         |          |          |         |
|-------------------|-----------|----------|---|--------|---------|----------|----------|---------|
| PLAQSHATK         |           |          |   |        |         |          |          |         |
| GHHEAEIK(+132.04) | 1984.9944 | 993.5029 | 2 | P02144 | y3      | 319.1966 | 319.1976 | 0.001   |
| PLAQSHATK         |           |          |   |        |         |          |          |         |
| GHHEAEIK(+132.04) | 1984.9944 | 993.5029 | 2 | P02144 | y4      | 456.2558 | 456.2565 | 0.0006  |
| PLAQSHATK         |           |          |   |        |         |          |          |         |
| GHHEAEIK(+132.04) | 1984.9944 | 993.5029 | 2 | P02144 | y5      | 543.2875 | 543.2885 | 0.001   |
| PLAQSHATK         |           |          |   |        |         |          |          |         |
| GHHEAEIK(+132.04) | 1984.9944 | 993.5029 | 2 | P02144 | y6      | 671.3473 | 671.3471 | -0.0002 |
| PLAQSHATK         |           |          |   |        |         |          |          |         |
| GHHEAEIK(+132.04) | 1984.9944 | 993.5029 | 2 | P02144 | y7      | 742.3799 | 742.3842 | 0.0043  |
| PLAQSHATK         |           |          |   |        |         |          |          |         |
| GHHEAEIK(+132.04) | 1984.9944 | 993.5029 | 2 | P02144 | y8      | 855.4664 | 855.4683 | 0.0019  |
| PLAQSHATK         |           |          |   |        |         |          |          |         |
| GHHEAEIK(+132.04) | 1984.9944 | 993.5029 | 2 | P02144 | y9      | 952.519  | 952.521  | 0.002   |
| PLAQSHATK         |           |          |   |        |         |          |          |         |
| GHHEAEIK(+132.04) | 1984.9944 | 993.5029 | 2 | P02144 | y9-H2O  | 934.5077 | 934.5104 | 0.0027  |
| PLAQSHATK         |           |          |   |        |         |          |          |         |
| GHHEAEIK(+132.04) | 1984.9944 | 398.0054 | 5 | P02144 | b2      | 195.0871 | 195.0882 | 0.0011  |
| PLAQSHATK         |           |          |   |        |         |          |          |         |
| GHHEAEIK(+132.04) | 1984.9944 | 398.0054 | 5 | P02144 | b4      | 461.189  | 461.1897 | 0.0007  |
| PLAQSHATK         |           |          |   |        |         |          |          |         |
| GHHEAEIK(+132.04) | 1984.9944 | 398.0054 | 5 | P02144 | b5      | 532.226  | 532.2268 | 0.0008  |
| PLAQSHATK         |           |          |   |        |         |          |          |         |
| GHHEAEIK(+132.04) | 1984.9944 | 398.0054 | 5 | P02144 | b6      | 661.2674 | 661.2694 | 0.002   |
| PLAQSHATK         |           |          |   |        |         |          |          |         |
| GHHEAEIK(+132.04) | 1984.9944 | 398.0054 | 5 | P02144 | b3-H2O  | 314.1356 | 314.1365 | 0.001   |
| PLAQSHATK         |           |          |   |        |         |          |          |         |
| GHHEAEIK(+132.04) | 1984.9944 | 398.0054 | 5 | P02144 | b4-H2O  | 443.1772 | 443.1791 | 0.0019  |
| PLAQSHATK         |           |          |   |        |         |          |          |         |
| GHHEAEIK(+132.04) | 1984.9944 | 398.0054 | 5 | P02144 | b3[2+]  | 166.5768 | 166.5735 | -0.0032 |
| PLAQSHATK         |           |          |   |        |         |          |          |         |
| GHHEAEIK(+132.04) | 1984.9944 | 398.0054 | 5 | P02144 | b4[2+]  | 231.0977 | 231.0948 | -0.0029 |
| PLAQSHATK         |           |          |   |        |         |          |          |         |
| GHHEAEIK(+132.04) | 1984.9944 | 398.0054 | 5 | P02144 | b5[2+]  | 266.6163 | 266.6134 | -0.0029 |
| PLAQSHATK         |           |          |   |        |         |          |          |         |
| GHHEAEIK(+132.04) | 1984.9944 | 398.0054 | 5 | P02144 | b10[2+] | 622.817  | 622.8126 | -0.0044 |
| PLAQSHATK         |           |          |   |        |         |          |          |         |
| GHHEAEIK(+132.04) | 1984.9944 | 398.0054 | 5 | P02144 | y2      | 248.16   | 248.1605 | 0.0004  |
| PLAQSHATK         |           |          |   |        |         |          |          |         |
| GHHEAEIK(+132.04) | 1984.9944 | 398.0054 | 5 | P02144 | y3      | 319.1971 | 319.1976 | 0.0005  |
| PLAQSHATK         |           |          |   |        |         |          |          |         |
| GHHEAEIK(+132.04) | 1984.9944 | 398.0054 | 5 | P02144 | y4      | 456.2555 | 456.2565 | 0.0009  |
| PLAQSHATK         |           |          |   |        |         |          |          |         |
| GHHEAEIK(+132.04) | 1984.9944 | 398.0054 | 5 | P02144 | y5      | 543.2874 | 543.2885 | 0.0011  |



|                   |           |          |   |        |        |          |          |         |
|-------------------|-----------|----------|---|--------|--------|----------|----------|---------|
| PLAQSHATK         |           |          |   |        |        |          |          |         |
| GHHEAEIK(+132.04) | 1984.9944 | 398.0054 | 5 | P02144 | y6     | 671.3454 | 671.3471 | 0.0017  |
| PLAQSHATK         |           |          |   |        |        |          |          |         |
| GHHEAEIK(+132.04) | 1984.9944 | 398.0054 | 5 | P02144 | y7     | 742.3823 | 742.3842 | 0.002   |
| PLAQSHATK         |           |          |   |        |        |          |          |         |
| GHHEAEIK(+132.04) | 1984.9944 | 398.0054 | 5 | P02144 | y8     | 855.4673 | 855.4683 | 0.001   |
| PLAQSHATK         |           |          |   |        |        |          |          |         |
| GHHEAEIK(+132.04) | 1984.9944 | 398.0054 | 5 | P02144 | y9     | 952.5187 | 952.521  | 0.0023  |
| PLAQSHATK         |           |          |   |        |        |          |          |         |
| GHHEAEIK(+132.04) | 1984.9944 | 398.0054 | 5 | P02144 | y2-H2O | 230.1496 | 230.1499 | 0.0003  |
| PLAQSHATK         |           |          |   |        |        |          |          |         |
| GHHEAEIK(+132.04) | 1984.9944 | 398.0054 | 5 | P02144 | y4-H2O | 438.2437 | 438.2459 | 0.0022  |
| PLAQSHATK         |           |          |   |        |        |          |          |         |
| GHHEAEIK(+132.04) | 1984.9944 | 398.0054 | 5 | P02144 | y5-H2O | 525.2753 | 525.278  | 0.0026  |
| PLAQSHATK         |           |          |   |        |        |          |          |         |
| GHHEAEIK(+132.04) | 1984.9944 | 398.0054 | 5 | P02144 | y6-H2O | 653.3369 | 653.3365 | -0.0003 |
| PLAQSHATK         |           |          |   |        |        |          |          |         |
| GHHEAEIK(+132.04) | 1984.9944 | 398.0054 | 5 | P02144 | y7-H2O | 724.3713 | 724.3737 | 0.0023  |
| PLAQSHATK         |           |          |   |        |        |          |          |         |
| GHHEAEIK(+132.04) | 1984.9944 | 398.0054 | 5 | P02144 | y6-NH3 | 654.322  | 654.3201 | -0.0019 |
| PLAQSHATK         |           |          |   |        |        |          |          |         |
| GHHEAEIK(+132.04) | 1984.9944 | 398.0054 | 5 | P02144 | y7-NH3 | 725.3637 | 725.3572 | -0.0065 |
| PLAQSHATK         |           |          |   |        |        |          |          |         |
| GHHEAEIK(+132.04) | 1984.9944 | 398.0054 | 5 | P02144 | y9-NH3 | 935.5002 | 935.494  | -0.0062 |
| PLAQSHATK         |           |          |   |        |        |          |          |         |
| GHHEAEIK(+132.04) | 1984.9944 | 398.0054 | 5 | P02144 | y4[2+] | 228.6314 | 228.6282 | -0.0032 |
| PLAQSHATK         |           |          |   |        |        |          |          |         |
| GHHEAEIK(+132.04) | 1984.9944 | 398.0054 | 5 | P02144 | y5[2+] | 272.1476 | 272.1443 | -0.0033 |
| PLAQSHATK         |           |          |   |        |        |          |          |         |
| GHHEAEIK(+132.04) | 1984.9944 | 398.0054 | 5 | P02144 | y8[2+] | 428.2376 | 428.2341 | -0.0035 |
| PLAQSHATK         |           |          |   |        |        |          |          |         |
| GHHEAEIK(+132.04) | 1984.9944 | 497.2552 | 4 | P02144 | b2     | 195.0872 | 195.0882 | 0.001   |
| PLAQSHATK         |           |          |   |        |        |          |          |         |
| GHHEAEIK(+132.04) | 1984.9944 | 497.2552 | 4 | P02144 | b4     | 461.188  | 461.1897 | 0.0017  |
| PLAQSHATK         |           |          |   |        |        |          |          |         |
| GHHEAEIK(+132.04) | 1984.9944 | 497.2552 | 4 | P02144 | b5     | 532.2249 | 532.2268 | 0.002   |
| PLAQSHATK         |           |          |   |        |        |          |          |         |
| GHHEAEIK(+132.04) | 1984.9944 | 497.2552 | 4 | P02144 | b6     | 661.2669 | 661.2694 | 0.0025  |
| PLAQSHATK         |           |          |   |        |        |          |          |         |
| GHHEAEIK(+132.04) | 1984.9944 | 497.2552 | 4 | P02144 | b7     | 774.3519 | 774.3535 | 0.0015  |
| PLAQSHATK         |           |          |   |        |        |          |          |         |
| GHHEAEIK(+132.04) | 1984.9944 | 497.2552 | 4 | P02144 | b3-H2O | 314.1353 | 314.1365 | 0.0012  |
| PLAQSHATK         |           |          |   |        |        |          |          |         |
| GHHEAEIK(+132.04) | 1984.9944 | 497.2552 | 4 | P02144 | b2-NH3 | 178.0607 | 178.0612 | 0.0005  |

|                   |           |          |   |        |        |          |          |         |
|-------------------|-----------|----------|---|--------|--------|----------|----------|---------|
| PLAQSHATK         |           |          |   |        |        |          |          |         |
| GHHEAEIK(+132.04) | 1984.9944 | 497.2552 | 4 | P02144 | y2     | 248.16   | 248.1605 | 0.0004  |
| PLAQSHATK         |           |          |   |        |        |          |          |         |
| GHHEAEIK(+132.04) | 1984.9944 | 497.2552 | 4 | P02144 | y3     | 319.1969 | 319.1976 | 0.0007  |
| PLAQSHATK         |           |          |   |        |        |          |          |         |
| GHHEAEIK(+132.04) | 1984.9944 | 497.2552 | 4 | P02144 | y4     | 456.2554 | 456.2565 | 0.0011  |
| PLAQSHATK         |           |          |   |        |        |          |          |         |
| GHHEAEIK(+132.04) | 1984.9944 | 497.2552 | 4 | P02144 | y5     | 543.2873 | 543.2885 | 0.0012  |
| PLAQSHATK         |           |          |   |        |        |          |          |         |
| GHHEAEIK(+132.04) | 1984.9944 | 497.2552 | 4 | P02144 | y6     | 671.3446 | 671.3471 | 0.0025  |
| PLAQSHATK         |           |          |   |        |        |          |          |         |
| GHHEAEIK(+132.04) | 1984.9944 | 497.2552 | 4 | P02144 | y7     | 742.3819 | 742.3842 | 0.0023  |
| PLAQSHATK         |           |          |   |        |        |          |          |         |
| GHHEAEIK(+132.04) | 1984.9944 | 497.2552 | 4 | P02144 | y8     | 855.465  | 855.4683 | 0.0032  |
| PLAQSHATK         |           |          |   |        |        |          |          |         |
| GHHEAEIK(+132.04) | 1984.9944 | 497.2552 | 4 | P02144 | y9     | 952.5175 | 952.521  | 0.0035  |
| PLAQSHATK         |           |          |   |        |        |          |          |         |
| GHHEAEIK(+132.04) | 1984.9944 | 497.2552 | 4 | P02144 | y2-H2O | 230.1496 | 230.1499 | 0.0003  |
| PLAQSHATK         |           |          |   |        |        |          |          |         |
| GHHEAEIK(+132.04) | 1984.9944 | 497.2552 | 4 | P02144 | y3-H2O | 301.1872 | 301.187  | -0.0002 |
| PLAQSHATK         |           |          |   |        |        |          |          |         |
| GHHEAEIK(+132.04) | 1984.9944 | 497.2552 | 4 | P02144 | y5-H2O | 525.2754 | 525.278  | 0.0026  |
| PLAQSHATK         |           |          |   |        |        |          |          |         |
| GHHEAEIK(+132.04) | 1984.9944 | 497.2552 | 4 | P02144 | y6-H2O | 653.3356 | 653.3365 | 0.001   |
| PLAQSHATK         |           |          |   |        |        |          |          |         |
| GHHEAEIK(+132.04) | 1984.9944 | 497.2552 | 4 | P02144 | y7-H2O | 724.3733 | 724.3737 | 0.0004  |
| PLAQSHATK         |           |          |   |        |        |          |          |         |
| GHHEAEIK(+132.04) | 1984.9944 | 497.2552 | 4 | P02144 | y9-H2O | 934.5184 | 934.5104 | -0.0079 |
| PLAQSHATK         |           |          |   |        |        |          |          |         |
| GHHEAEIK(+132.04) | 1984.9944 | 497.2552 | 4 | P02144 | y6-NH3 | 654.3206 | 654.3201 | -0.0004 |
| PLAQSHATK         |           |          |   |        |        |          |          |         |
| GHHEAEIK(+132.04) | 1984.9944 | 497.2552 | 4 | P02144 | y7-NH3 | 725.3631 | 725.3572 | -0.0059 |
| PLAQSHATK         |           |          |   |        |        |          |          |         |
| GHHEAEIK(+132.04) | 1984.9944 | 497.2552 | 4 | P02144 | y8-NH3 | 838.4538 | 838.4413 | -0.0125 |
| PLAQSHATK         |           |          |   |        |        |          |          |         |
| GHHEAEIK(+132.04) | 1984.9944 | 497.2552 | 4 | P02144 | y9-NH3 | 935.5021 | 935.494  | -0.0081 |
| PLAQSHATK         |           |          |   |        |        |          |          |         |
| GHHEAEIK(+132.04) | 1984.9944 | 497.2552 | 4 | P02144 | y7[2+] | 371.6949 | 371.6921 | -0.0028 |
| PLAQSHATK         |           |          |   |        |        |          |          |         |
| GHHEAEIK(+132.04) | 1984.9944 | 662.671  | 3 | P02144 | b2     | 195.0873 | 195.0882 | 0.0009  |
| PLAQSHATK         |           |          |   |        |        |          |          |         |
| GHHEAEIK(+132.04) | 1984.9944 | 662.671  | 3 | P02144 | b3     | 332.146  | 332.1471 | 0.0011  |
| PLAQSHATK         |           |          |   |        |        |          |          |         |
| GHHEAEIK(+132.04) | 1984.9944 | 662.671  | 3 | P02144 | b4     | 461.1882 | 461.1897 | 0.0015  |

|                   |           |         |   |        |        |          |          |         |
|-------------------|-----------|---------|---|--------|--------|----------|----------|---------|
| PLAQSHATK         |           |         |   |        |        |          |          |         |
| GHHEAEIK(+132.04) | 1984.9944 | 662.671 | 3 | P02144 | b5     | 532.225  | 532.2268 | 0.0018  |
| PLAQSHATK         |           |         |   |        |        |          |          |         |
| GHHEAEIK(+132.04) | 1984.9944 | 662.671 | 3 | P02144 | b6     | 661.2674 | 661.2694 | 0.002   |
| PLAQSHATK         |           |         |   |        |        |          |          |         |
| GHHEAEIK(+132.04) | 1984.9944 | 662.671 | 3 | P02144 | b7     | 774.3521 | 774.3535 | 0.0013  |
| PLAQSHATK         |           |         |   |        |        |          |          |         |
| GHHEAEIK(+132.04) | 1984.9944 | 662.671 | 3 | P02144 | b3-H2O | 314.1355 | 314.1365 | 0.001   |
| PLAQSHATK         |           |         |   |        |        |          |          |         |
| GHHEAEIK(+132.04) | 1984.9944 | 662.671 | 3 | P02144 | b4-H2O | 443.1785 | 443.1791 | 0.0006  |
| PLAQSHATK         |           |         |   |        |        |          |          |         |
| GHHEAEIK(+132.04) | 1984.9944 | 662.671 | 3 | P02144 | b2-NH3 | 178.0608 | 178.0612 | 0.0004  |
| PLAQSHATK         |           |         |   |        |        |          |          |         |
| GHHEAEIK(+132.04) | 1984.9944 | 662.671 | 3 | P02144 | b3-NH3 | 315.1385 | 315.1201 | -0.0184 |
| PLAQSHATK         |           |         |   |        |        |          |          |         |
| GHHEAEIK(+132.04) | 1984.9944 | 662.671 | 3 | P02144 | b6-NH3 | 644.2597 | 644.2424 | -0.0173 |
| PLAQSHATK         |           |         |   |        |        |          |          |         |
| GHHEAEIK(+132.04) | 1984.9944 | 662.671 | 3 | P02144 | b6[2+] | 331.1375 | 331.1347 | -0.0028 |
| PLAQSHATK         |           |         |   |        |        |          |          |         |
| GHHEAEIK(+132.04) | 1984.9944 | 662.671 | 3 | P02144 | y2     | 248.1601 | 248.1605 | 0.0004  |
| PLAQSHATK         |           |         |   |        |        |          |          |         |
| GHHEAEIK(+132.04) | 1984.9944 | 662.671 | 3 | P02144 | y3     | 319.1971 | 319.1976 | 0.0005  |
| PLAQSHATK         |           |         |   |        |        |          |          |         |
| GHHEAEIK(+132.04) | 1984.9944 | 662.671 | 3 | P02144 | y4     | 456.2552 | 456.2565 | 0.0012  |
| PLAQSHATK         |           |         |   |        |        |          |          |         |
| GHHEAEIK(+132.04) | 1984.9944 | 662.671 | 3 | P02144 | y5     | 543.2878 | 543.2885 | 0.0007  |
| PLAQSHATK         |           |         |   |        |        |          |          |         |
| GHHEAEIK(+132.04) | 1984.9944 | 662.671 | 3 | P02144 | y6     | 671.3461 | 671.3471 | 0.001   |
| PLAQSHATK         |           |         |   |        |        |          |          |         |
| GHHEAEIK(+132.04) | 1984.9944 | 662.671 | 3 | P02144 | y7     | 742.3823 | 742.3842 | 0.0019  |
| PLAQSHATK         |           |         |   |        |        |          |          |         |
| GHHEAEIK(+132.04) | 1984.9944 | 662.671 | 3 | P02144 | y8     | 855.465  | 855.4683 | 0.0033  |
| PLAQSHATK         |           |         |   |        |        |          |          |         |
| GHHEAEIK(+132.04) | 1984.9944 | 662.671 | 3 | P02144 | y9     | 952.5188 | 952.521  | 0.0022  |
| PLAQSHATK         |           |         |   |        |        |          |          |         |
| GHHEAEIK(+132.04) | 1984.9944 | 662.671 | 3 | P02144 | y2-H2O | 230.1497 | 230.1499 | 0.0002  |
| PLAQSHATK         |           |         |   |        |        |          |          |         |
| GHHEAEIK(+132.04) | 1984.9944 | 662.671 | 3 | P02144 | y3-H2O | 301.1867 | 301.187  | 0.0003  |
| PLAQSHATK         |           |         |   |        |        |          |          |         |
| GHHEAEIK(+132.04) | 1984.9944 | 662.671 | 3 | P02144 | y4-H2O | 438.2462 | 438.2459 | -0.0003 |
| PLAQSHATK         |           |         |   |        |        |          |          |         |
| GHHEAEIK(+132.04) | 1984.9944 | 662.671 | 3 | P02144 | y9-H2O | 934.5082 | 934.5104 | 0.0022  |
| PLAQSHATK         |           |         |   |        |        |          |          |         |
| GHHEAEIK(+132.04) | 1984.9944 | 662.671 | 3 | P02144 | y9-NH3 | 935.5074 | 935.494  | -0.0134 |

|                   |           |          |   |        |        |          |           |         |
|-------------------|-----------|----------|---|--------|--------|----------|-----------|---------|
| PLAQSHATK         |           |          |   |        |        |          |           |         |
| GHHEAEIK(+132.04) | 1984.9944 | 662.671  | 3 | P02144 | y10-NH | 1195.617 |           |         |
| PLAQSHATK         |           |          |   |        | 3      | 4        | 1195.629  | 0.0116  |
| SEDEMK(+132.04)AS | 1512.6478 | 757.3307 | 2 | P02144 | b2     | 217.0814 | 217.0824  | 0.001   |
| EDLK              |           |          |   |        |        |          |           |         |
| SEDEMK(+132.04)AS | 1512.6478 | 757.3307 | 2 | P02144 | b3     | 332.1082 | 332.1094  | 0.0012  |
| EDLK              |           |          |   |        |        |          |           |         |
| SEDEMK(+132.04)AS | 1512.6478 | 757.3307 | 2 | P02144 | b4     | 461.1509 | 461.1519  | 0.0011  |
| EDLK              |           |          |   |        |        |          |           |         |
| SEDEMK(+132.04)AS | 1512.6478 | 757.3307 | 2 | P02144 | b5     | 592.1906 | 592.1924  | 0.0019  |
| EDLK              |           |          |   |        |        |          |           |         |
| SEDEMK(+132.04)AS | 1512.6478 | 757.3307 | 2 | P02144 | b10    | 1254.465 |           |         |
| EDLK              |           |          |   |        |        | 8        | 1254.4661 | 0.0002  |
| SEDEMK(+132.04)AS | 1512.6478 | 757.3307 | 2 | P02144 | b2-H2O | 199.0714 | 199.0719  | 0.0004  |
| EDLK              |           |          |   |        |        |          |           |         |
| SEDEMK(+132.04)AS | 1512.6478 | 757.3307 | 2 | P02144 | b3-H2O | 314.0981 | 314.0988  | 0.0007  |
| EDLK              |           |          |   |        |        |          |           |         |
| SEDEMK(+132.04)AS | 1512.6478 | 757.3307 | 2 | P02144 | b4-H2O | 443.1407 | 443.1414  | 0.0007  |
| EDLK              |           |          |   |        |        |          |           |         |
| SEDEMK(+132.04)AS | 1512.6478 | 757.3307 | 2 | P02144 | b5-H2O | 574.1797 | 574.1819  | 0.0021  |
| EDLK              |           |          |   |        |        |          |           |         |
| SEDEMK(+132.04)AS | 1512.6478 | 757.3307 | 2 | P02144 | b6-H2O | 834.3123 | 834.3168  | 0.0045  |
| EDLK              |           |          |   |        |        |          |           |         |
| SEDEMK(+132.04)AS | 1512.6478 | 757.3307 | 2 | P02144 | b7-NH3 | 906.3514 | 906.3375  | -0.0139 |
| EDLK              |           |          |   |        |        |          |           |         |
| SEDEMK(+132.04)AS | 1512.6478 | 757.3307 | 2 | P02144 | b9-NH3 | 1122.424 |           |         |
| EDLK              |           |          |   |        |        | 9        | 1122.4121 | -0.0128 |
| SEDEMK(+132.04)AS | 1512.6478 | 757.3307 | 2 | P02144 | y1     | 147.1125 | 147.1128  | 0.0003  |
| EDLK              |           |          |   |        |        |          |           |         |
| SEDEMK(+132.04)AS | 1512.6478 | 757.3307 | 2 | P02144 | y2     | 260.1963 | 260.1968  | 0.0005  |
| EDLK              |           |          |   |        |        |          |           |         |
| SEDEMK(+132.04)AS | 1512.6478 | 757.3307 | 2 | P02144 | y3     | 375.223  | 375.2238  | 0.0008  |
| EDLK              |           |          |   |        |        |          |           |         |
| SEDEMK(+132.04)AS | 1512.6478 | 757.3307 | 2 | P02144 | y4     | 504.2656 | 504.2664  | 0.0007  |
| EDLK              |           |          |   |        |        |          |           |         |
| SEDEMK(+132.04)AS | 1512.6478 | 757.3307 | 2 | P02144 | y5     | 591.2977 | 591.2984  | 0.0007  |
| EDLK              |           |          |   |        |        |          |           |         |
| SEDEMK(+132.04)AS | 1512.6478 | 757.3307 | 2 | P02144 | y6     | 662.3344 | 662.3355  | 0.0011  |
| EDLK              |           |          |   |        |        |          |           |         |
| SEDEMK(+132.04)AS | 1512.6478 | 757.3307 | 2 | P02144 | y1-H2O | 129.102  | 129.1022  | 0.0003  |
| EDLK              |           |          |   |        |        |          |           |         |
| SEDEMK(+132.04)AS | 1512.6478 | 757.3307 | 2 | P02144 | y2-H2O | 242.1858 | 242.1863  | 0.0005  |
| EDLK              |           |          |   |        |        |          |           |         |

|                           |           |          |   |        |        |               |           |         |
|---------------------------|-----------|----------|---|--------|--------|---------------|-----------|---------|
| SEDEMK(+132.04)AS<br>EDLK | 1512.6478 | 757.3307 | 2 | P02144 | y4-H2O | 486.2553      | 486.2558  | 0.0005  |
| SEDEMK(+132.04)AS<br>EDLK | 1512.6478 | 757.3307 | 2 | P02144 | y5-H2O | 573.2876      | 573.2878  | 0.0002  |
| SEDEMK(+132.04)AS<br>EDLK | 1512.6478 | 757.3307 | 2 | P02144 | y6-H2O | 644.3219      | 644.325   | 0.0031  |
| SEDEMK(+132.04)AS<br>EDLK | 1512.6478 | 757.3307 | 2 | P02144 | y1-NH3 | 130.086       | 130.0858  | -0.0002 |
| SEDEMK(+132.04)AS<br>EDLK | 1512.6478 | 757.3307 | 2 | P02144 | y2-NH3 | 243.1698      | 243.1698  | 0       |
| SEDEMK(+132.04)AS<br>EDLK | 1512.6478 | 757.3307 | 2 | P02144 | y9-NH3 | 1165.534<br>2 | 1165.5266 | -0.0076 |
| SEDEMK(+132.04)AS<br>EDLK | 1512.6478 | 505.2228 | 3 | P02144 | b2     | 217.0816      | 217.0824  | 0.0008  |
| SEDEMK(+132.04)AS<br>EDLK | 1512.6478 | 505.2228 | 3 | P02144 | b3     | 332.1086      | 332.1094  | 0.0008  |
| SEDEMK(+132.04)AS<br>EDLK | 1512.6478 | 505.2228 | 3 | P02144 | b4     | 461.1501      | 461.1519  | 0.0018  |
| SEDEMK(+132.04)AS<br>EDLK | 1512.6478 | 505.2228 | 3 | P02144 | b2-H2O | 199.0712      | 199.0719  | 0.0007  |
| SEDEMK(+132.04)AS<br>EDLK | 1512.6478 | 505.2228 | 3 | P02144 | b3-H2O | 314.0973      | 314.0988  | 0.0015  |
| SEDEMK(+132.04)AS<br>EDLK | 1512.6478 | 505.2228 | 3 | P02144 | b4-H2O | 443.1376      | 443.1414  | 0.0038  |
| SEDEMK(+132.04)AS<br>EDLK | 1512.6478 | 505.2228 | 3 | P02144 | b7-NH3 | 906.343       | 906.3375  | -0.0054 |
| SEDEMK(+132.04)AS<br>EDLK | 1512.6478 | 505.2228 | 3 | P02144 | y1     | 147.1126      | 147.1128  | 0.0002  |
| SEDEMK(+132.04)AS<br>EDLK | 1512.6478 | 505.2228 | 3 | P02144 | y2     | 260.1965      | 260.1968  | 0.0003  |
| SEDEMK(+132.04)AS<br>EDLK | 1512.6478 | 505.2228 | 3 | P02144 | y3     | 375.2238      | 375.2238  | 0       |
| SEDEMK(+132.04)AS<br>EDLK | 1512.6478 | 505.2228 | 3 | P02144 | y4     | 504.2673      | 504.2664  | -0.0009 |
| SEDEMK(+132.04)AS<br>EDLK | 1512.6478 | 505.2228 | 3 | P02144 | y5     | 591.2977      | 591.2984  | 0.0007  |
| SEDEMK(+132.04)AS<br>EDLK | 1512.6478 | 505.2228 | 3 | P02144 | y6     | 662.3344      | 662.3355  | 0.0012  |
| SEDEMK(+132.04)AS<br>EDLK | 1512.6478 | 505.2228 | 3 | P02144 | y10    | 1297.580<br>2 | 1297.5804 | 0.0002  |
| SEDEMK(+132.04)AS<br>EDLK | 1512.6478 | 505.2228 | 3 | P02144 | y1-H2O | 129.1021      | 129.1022  | 0.0001  |
| SEDEMK(+132.04)AS<br>EDLK | 1512.6478 | 505.2228 | 3 | P02144 | y2-H2O | 242.1859      | 242.1863  | 0.0004  |

|                                    |           |          |   |        |        |          |          |         |
|------------------------------------|-----------|----------|---|--------|--------|----------|----------|---------|
| SEDEMK(+132.04)AS<br>EDLK          | 1512.6478 | 505.2228 | 3 | P02144 | y4-H2O | 486.2564 | 486.2558 | -0.0006 |
| SEDEMK(+132.04)AS<br>EDLK          | 1512.6478 | 505.2228 | 3 | P02144 | y6-H2O | 644.3246 | 644.325  | 0.0003  |
| SEDEMK(+132.04)AS<br>EDLK          | 1512.6478 | 505.2228 | 3 | P02144 | y1-NH3 | 130.0861 | 130.0858 | -0.0003 |
| SEDEMK(+132.04)AS<br>EDLK          | 1512.6478 | 505.2228 | 3 | P02144 | y2-NH3 | 243.1699 | 243.1698 | 0       |
| SEDEMK(+132.04)AS<br>EDLK          | 1512.6478 | 505.2228 | 3 | P02144 | y7[2+] | 461.7388 | 461.7352 | -0.0035 |
| SEDEMK(+132.04)AS<br>EDLK          | 1512.6478 | 505.2228 | 3 | P02144 | y9[2+] | 591.774  | 591.7768 | 0.0027  |
| DM(+15.99)ASNYK(+<br>132.04)ELGFQG | 1606.6798 | 804.3466 | 2 | P02144 | b2     | 263.0693 | 263.0702 | 0.0008  |
| DM(+15.99)ASNYK(+<br>132.04)ELGFQG | 1606.6798 | 804.3466 | 2 | P02144 | b3     | 334.1061 | 334.1073 | 0.0012  |
| DM(+15.99)ASNYK(+<br>132.04)ELGFQG | 1606.6798 | 804.3466 | 2 | P02144 | b2-NH3 | 246.0423 | 246.0432 | 0.0009  |
| DM(+15.99)ASNYK(+<br>132.04)ELGFQG | 1606.6798 | 804.3466 | 2 | P02144 | y2     | 204.0976 | 204.0979 | 0.0003  |
| DM(+15.99)ASNYK(+<br>132.04)ELGFQG | 1606.6798 | 804.3466 | 2 | P02144 | y3     | 351.1664 | 351.1663 | -0.0001 |
| DM(+15.99)ASNYK(+<br>132.04)ELGFQG | 1606.6798 | 804.3466 | 2 | P02144 | y2-H2O | 186.0869 | 186.0873 | 0.0004  |
| DM(+15.99)ASNYK(+<br>132.04)ELGFQG | 1606.6798 | 804.3466 | 2 | P02144 | y3-H2O | 333.156  | 333.1557 | -0.0003 |
| DM(+15.99)ASNYK(+<br>132.04)ELGFQG | 1606.6798 | 804.3466 | 2 | P02144 | y2-NH3 | 187.0709 | 187.0709 | 0       |
| DM(+15.99)ASNYK(+<br>132.04)ELGFQG | 1606.6798 | 804.3452 | 2 | P02144 | b2     | 263.0692 | 263.0702 | 0.001   |
| DM(+15.99)ASNYK(+<br>132.04)ELGFQG | 1606.6798 | 804.3452 | 2 | P02144 | b3     | 334.1062 | 334.1073 | 0.0011  |
| DM(+15.99)ASNYK(+<br>132.04)ELGFQG | 1606.6798 | 804.3452 | 2 | P02144 | b4     | 421.1388 | 421.1393 | 0.0005  |
| DM(+15.99)ASNYK(+<br>132.04)ELGFQG | 1606.6798 | 804.3452 | 2 | P02144 | b6     | 698.2434 | 698.2455 | 0.0021  |
| DM(+15.99)ASNYK(+<br>132.04)ELGFQG | 1606.6798 | 804.3452 | 2 | P02144 | b3-H2O | 316.0957 | 316.0967 | 0.001   |
| DM(+15.99)ASNYK(+<br>132.04)ELGFQG | 1606.6798 | 804.3452 | 2 | P02144 | b5-H2O | 517.1679 | 517.1717 | 0.0038  |
| DM(+15.99)ASNYK(+<br>132.04)ELGFQG | 1606.6798 | 804.3452 | 2 | P02144 | b2-NH3 | 246.0425 | 246.0432 | 0.0007  |
| DM(+15.99)ASNYK(+<br>132.04)ELGFQG | 1606.6798 | 804.3452 | 2 | P02144 | y2     | 204.0975 | 204.0979 | 0.0004  |

|                                    |           |          |   |        |        |          |          |         |
|------------------------------------|-----------|----------|---|--------|--------|----------|----------|---------|
| DM(+15.99)ASNYK(+<br>132.04)ELGFQG | 1606.6798 | 804.3452 | 2 | P02144 | y3     | 351.1663 | 351.1663 | 0       |
| DM(+15.99)ASNYK(+<br>132.04)ELGFQG | 1606.6798 | 804.3452 | 2 | P02144 | y4     | 408.1869 | 408.1877 | 0.0009  |
| DM(+15.99)ASNYK(+<br>132.04)ELGFQG | 1606.6798 | 804.3452 | 2 | P02144 | y2-H2O | 186.0869 | 186.0873 | 0.0004  |
| DM(+15.99)ASNYK(+<br>132.04)ELGFQG | 1606.6798 | 804.3452 | 2 | P02144 | y3-H2O | 333.1544 | 333.1557 | 0.0013  |
| DM(+15.99)ASNYK(+<br>132.04)ELGFQG | 1606.6798 | 804.3452 | 2 | P02144 | y2-NH3 | 187.071  | 187.0709 | -0.0001 |
| DM(+15.99)ASNYK(+<br>132.04)ELGFQG | 1606.6798 | 804.3452 | 2 | P02144 | y3-NH3 | 334.1397 | 334.1393 | -0.0004 |

---
